# Supplementary material
Source: PubMed Central journal article supplement (PMC4788014)
Supplement: sonf851501.ww3_default.pdf [file sonf851501.ww3_default.pdf]

### Appendix 3.

#### Main characteristics and references of included trial-networks

| Cases                  | Source <sup>ξ</sup> | Disease category                                     | Intervention A, B, C                                                        | A newer or more intense | Outcome measures                  | Outcome:<br>Objective=1<br>subjective=0 | No. of trials |     |     |
|------------------------|---------------------|------------------------------------------------------|-----------------------------------------------------------------------------|-------------------------|-----------------------------------|-----------------------------------------|---------------|-----|-----|
|                        |                     |                                                      |                                                                             |                         |                                   |                                         | AvB           | AvC | BvC |
| CD000053 <sup>W1</sup> | CSR                 | Urinary Schistosomiasis                              | A: Praziquantel;<br>B: Metrifonate;<br>C: Placebo                           | A: newer                | Parasitological failure (1-12mon) | 1                                       | 5             | 2   | 4   |
| CD000146 <sup>W2</sup> | CSR                 | Smokers                                              | A: NRT patch;<br>B: NRT spray;<br>C: Placebo or no-NRT                      | unclear                 | Cessation rate                    | 1                                       | 2             | 41  | 4   |
| CD000165 <sup>W3</sup> | CSR                 | Smokers                                              | A: Multiple visit;<br>B: single visit;<br>C: Usual care                     | A: more intense         | Smoking                           | 1                                       | 5             | 5   | 18  |
| CD000184 <sup>W4</sup> | CSR                 | Breech presentation                                  | A: Betamimetic;<br>B: Nitric oxide donor;<br>C: Control                     | unclear                 | Failed external cephalic version  | 1                                       | 2             | 6   | 2   |
| CD000195 <sup>W5</sup> | CSR                 | Asthma (acute exacerbation)                          | A: Intramuscular corticosteroids;<br>B: Oral corticosteroids;<br>C: Placebo | A: more intense         | Relapse rates                     | 1                                       | 1             | 3   | 1   |
| CD000218 <sup>W6</sup> | CSR                 | Trichomoniasis                                       | A: Metronidazole;<br>B: Nimorazole;<br>C: Ornidazole                        | unclear                 | No parasitological cure           | 1                                       | 7             | 1   | 1   |
| CD000227 <sup>W7</sup> | CSR                 | Fractures associated with involution or osteoporosis | A: Vitamins D + Calcium;<br>B: Vitamin D;<br>C: Placebo or control          | A: added                | New hip fracture                  | 1                                       | 3             | 4   | 4   |

| Cases                   | Source <sup>ξ</sup> | Disease category        | Intervention A, B, C                                                                      | A newer or more intense | Outcome measures                                | Outcome:<br>Objective=1<br>subjective=0 | No. of trials |     |     |
|-------------------------|---------------------|-------------------------|-------------------------------------------------------------------------------------------|-------------------------|-------------------------------------------------|-----------------------------------------|---------------|-----|-----|
|                         |                     |                         |                                                                                           |                         |                                                 |                                         | AvB           | AvC | BvC |
| CD000256 <sup>W8</sup>  | CSR                 | Uncomplicated malaria   | A: Artesunate;<br>B: Artemether;<br>C: Chloroquine                                        | unclear                 | Not parasite clearance at day 7                 | 1                                       | 4             | 1   | 1   |
| CD000305 <sup>W9</sup>  | CSR                 | Deep vein thrombosis    | A: LMW heparin;<br>B: Unfractionated heparin;<br>C: Placebo or no heparin                 | A: newer                | Any DVT                                         | 1                                       | 3             | 3   | 10  |
| CD000307 <sup>W10</sup> | CSR                 | Schizophrenia           | A: Fluphenazine decanoate;<br>B: Fluphenazine enanthate;<br>C: Oral neuroleptic           | unclear                 | Movement disorders general                      | 0                                       | 2             | 4   | 1   |
| CD000320 <sup>W11</sup> | CSR                 | Scabies                 | A: Permethrin;<br>B: Lindane;<br>C: Ivermectin                                            | A: newer                | Treatment failure in clinically diagnosed cases | 0                                       | 5             | 1   | 2   |
| CD000402 <sup>W12</sup> | CSR                 | Endometrial hyperplasia | A: Oestrogen+ Progestagen (sequential);<br>B: Oestrogen;<br>C: Placebo                    | A: added                | Endometrial hyperplasia at 12 months            | 1                                       | 4             | 1   | 3   |
| CD000527 <sup>W13</sup> | CSR                 | Severe malaria          | A: Arestunate;<br>B: Artesmisinin;<br>C: Quinine                                          | unclear                 | Mortality                                       | 1                                       | 3             | 2   | 1   |
| CD001103 <sup>W14</sup> | CSR                 | Venous leg ulcer        | A: Low adherent;<br>B: Hydrocolloid dressing;<br>C: Foam dressing                         | unclear                 | Total number of ulcers healed                   | 1                                       | 8             | 2   | 4   |
| CD001136 <sup>W15</sup> | CSR                 | Caesarean section       | A: 2nd/3rd generation cephalosporin;<br>B: 1st generation cephalosporin;<br>C: Ampicillin | A: newer                | Endometritis                                    | 1                                       | 9             | 1   | 1   |

| Cases                   | Source <sup>ξ</sup> | Disease category                         | Intervention A, B, C                                                       | A newer or more intense | Outcome measures                       | Outcome:<br>Objective=1<br>subjective=0 | No. of trials |     |     |
|-------------------------|---------------------|------------------------------------------|----------------------------------------------------------------------------|-------------------------|----------------------------------------|-----------------------------------------|---------------|-----|-----|
|                         |                     |                                          |                                                                            |                         |                                        |                                         | AvB           | AvC | BvC |
| CD001169 <sup>W16</sup> | CSR                 | Influenza A                              | A: Rimantadine;<br>B: Amantadine;<br>C: Placebo                            | A: newer                | Influenza cases                        | 1                                       | 2             | 9   | 1   |
| CD001190 <sup>W17</sup> | CSR                 | Alzheimer's disease                      | A: Donepezil 10mg/d;<br>B: Donepezil 5mg/d;<br>C: Placebo                  | A: more intense         | Numbers of improved                    | 0                                       | 2             | 2   | 1   |
| CD001209 <sup>W18</sup> | CSR                 | Urinary tract infection                  | A: Norfloxacin;<br>B: Nitrofurantoin;<br>C: Placebo                        | A: newer                | Microbiological recurrence             | 1                                       | 1             | 2   | 1   |
| CD001217 <sup>W19</sup> | CSR                 | Thromboprophylaxis in colorectal surgery | A: LMW Heparin coverage;<br>B: LD Heparin;<br>C: Placebo or no treatment   | A: newer                | Deep venous thrombosis (DVT)           | 1                                       | 3             | 1   | 3   |
| CD001319 <sup>W20</sup> | CSR                 | Fluid resuscitation                      | A: Albumin/PPF;<br>B: HES;<br>C: Gelatine                                  | unclear                 | Death                                  | 1                                       | 13            | 1   | 11  |
| CD001324 <sup>W21</sup> | CSR                 | Unprotected intercourse                  | A: Mifepristone (25-50 mg);<br>B: Mifeprestone <25mg;<br>C: Levonorgestrel | A: more intense         | Pregnancy                              | 1                                       | 18            | 15  | 8   |
| CD001434 <sup>W22</sup> | CSR                 | Tinea pedis                              | A: Allylamines;<br>B: Azoles;<br>C: Placebo                                | unclear                 | short-term (2 weeks) treatment failure | 1                                       | 10            | 9   | 5   |
| CD001449 <sup>W23</sup> | CSR                 | Hypertension during pregnancy            | A: Calcium channel blockers;<br>B: Hyralazine;<br>C: Labetolol             | A: newer                | Persistent high BP                     | 1                                       | 3             | 1   | 1   |
| CD001501 <sup>W24</sup> | CSR                 | Menorrhagia                              | A: Laser ablation;<br>B: TCRE;<br>C: Balloon ablation                      | unclear                 | Participant satisfaction at 12 mon     | 0                                       | 1             | 1   | 1   |

| Cases                   | Source <sup>ξ</sup> | Disease category               | Intervention A, B, C                                                                                  | A newer or more intense | Outcome measures                                | Outcome:<br>Objective=1<br>subjective=0 | No. of trials |     |     |
|-------------------------|---------------------|--------------------------------|-------------------------------------------------------------------------------------------------------|-------------------------|-------------------------------------------------|-----------------------------------------|---------------|-----|-----|
|                         |                     |                                |                                                                                                       |                         |                                                 |                                         | AvB           | AvC | BvC |
| CD001535 <sup>W25</sup> | CSR                 | lower urinary tract infections | A: Long course;<br>B: Short course;<br>C: Single                                                      | A: more intense         | Persistent UIT                                  | 1                                       | 3             | 5   | 3   |
| CD001751 <sup>W26</sup> | CSR                 | Dysmenorrhea                   | A: Diclofenac;<br>B: Nimesulide;<br>C: Placebo                                                        | unclear                 | Subjective pain relief                          | 0                                       | 1             | 2   | 1   |
| CD001781 <sup>W27</sup> | CSR                 | Cutaneous warts                | A: Cryotherapy;<br>B: Salicylic + lactic acid;<br>C: Placebo/no treatment                             | unclear                 | Not cure rate                                   | 1                                       | 3             | 2   | 5   |
| CD001782 <sup>W28</sup> | CSR                 | Photodamage skin               | A: Topical tretinoin 0.05%;<br>B: Topical tretinoin 0.01%;<br>C: Placebo                              | A: more intense         | No overall improved - investigator's assessment | 0                                       | 2             | 1   | 1   |
| CD001886 <sup>W29</sup> | CSR                 | Cardiac surgery                | A: Tranexamic acid;<br>B: Aprotinin;<br>C: Control                                                    | A: newer                | Mortality (cardia surgery subgroup)             | 1                                       | 5             | 28  | 9   |
| CD001896 <sup>W30</sup> | CSR                 | Dysmenorrhoea                  | A: Laparoscopic presacral neurectomy;<br>B: Laparoscopic uterine nerve ablation (LUNA);<br>C: Control | unclear                 | No pain relief up to 12 months                  | 0                                       | 1             | 1   | 2   |
| CD001951 <sup>W31</sup> | CSR                 | Schizophrenia                  | A: Haloperidon 15-35 mg/d;<br>B: Haloperidol 7.5-15 mg/d;<br>C: Haloperidol >35mg/d                   | A: more intense         | Leaving study early                             | 1                                       | 5             | 1   | 2   |
| CD001960 <sup>W32</sup> | CSR                 | Dyspepsia                      | A: PPI;<br>B: H2RA;<br>C: Antacids                                                                    | A: newer                | No global symptom response                      | 0                                       | 2             | 9   | 11  |

| Cases                    | Source <sup>ξ</sup> | Disease category                          | Intervention A, B, C                                                      | A newer or more intense | Outcome measures                              | Outcome:<br>Objective=1<br>subjective=0 | No. of trials |     |     |
|--------------------------|---------------------|-------------------------------------------|---------------------------------------------------------------------------|-------------------------|-----------------------------------------------|-----------------------------------------|---------------|-----|-----|
|                          |                     |                                           |                                                                           |                         |                                               |                                         | AvB           | AvC | BvC |
| CD001961 <sup>W33</sup>  | CSR                 | Dyspepsia                                 | A: PPI;<br>B: H2RA;<br>C: Antacids                                        | A: newer                | No global improvement                         | 0                                       | 3             | 3   | 1   |
| CD002095 <sup>W34</sup>  | CSR                 | Reflux disease - positive endoscopy       | A: PPI;<br>B: H2RA;<br>C: Placebo                                         | A: newer                | Heartburn remission                           | 0                                       | 7             | 2   | 2   |
| CD002095a <sup>W34</sup> | CSR                 | Reflux disease - negative endoscopy       | A: PPI;<br>B: H2RA;<br>C: Placebo                                         | A: newer                | Heartburn remission                           | 0                                       | 4             | 7   | 2   |
| CD002123 <sup>W35</sup>  | CSR                 | Dysmenorrhoea                             | A: High frequency TENS;<br>B: Low frequency TENS;<br>C: Placebo TENS      | A: more intense         | No pain relief – overall experience           | 0                                       | 1             | 1   | 1   |
| CD002251 <sup>W36</sup>  | CSR                 | Hypotension during caesarean section      | A: Ephedrine;<br>B: Crystalloid;<br>C: Control                            | unclear                 | Women with hypotension requiring intervention | 1                                       | 4             | 6   | 1   |
| CD002252 <sup>W37</sup>  | CSR                 | Hypertension during pregnancy             | A: Beta-blocker;<br>B: Methyldopa;<br>C: Control (none)                   | A: newer                | Proteinuria/pre-eclampsia                     | 1                                       | 9             | 8   | 2   |
| CD002296 <sup>W38</sup>  | CSR                 | Gastroduodenal ulcers                     | A: PPI;<br>B: H2RA;<br>C: Placebo                                         | A: newer                | Total endoscopic ulcers                       | 1                                       | 1             | 5   | 5   |
| CD002780 <sup>W39</sup>  | CSR                 | Dental Caries                             | A: Fluoride toothpaste;<br>B: Fluoride mouthrinse;<br>C: Fluoride varnish | unclear                 | Leaving study early                           | 1                                       | 5             | 1   | 2   |
| CD002898 <sup>W40</sup>  | CSR                 | Herpes simplex virus epithelial keratitis | A: Acyclovir;<br>B: Idoxuridine;<br>C: Trifluridine                       | unclear                 | Not healing at 14 days                        | 1                                       | 11            | 3   | 4   |

| Cases                   | Source <sup>§</sup> | Disease category                 | Intervention A, B, C                                                             | A newer or more intense | Outcome measures                                  | Outcome:<br>Objective=1<br>subjective=0 | No. of trials |     |     |
|-------------------------|---------------------|----------------------------------|----------------------------------------------------------------------------------|-------------------------|---------------------------------------------------|-----------------------------------------|---------------|-----|-----|
|                         |                     |                                  |                                                                                  |                         |                                                   |                                         | AvB           | AvC | BvC |
| CD002916 <sup>W41</sup> | CSR                 | Malignant pleural effusion       | A: Talc;<br>B: Tetracycline;<br>C: Control                                       | unclear                 | No recurrence of effusions                        | 1                                       | 3             | 2   | 2   |
| CD003101 <sup>W42</sup> | CSR                 | Induction of labour              | A: Prostaglandin E2;<br>B: Prostaglandin F2a (PGF2a);<br>C: Placebo/no treatment | unclear                 | Caesarean section                                 | 1                                       | 2             | 31  | 2   |
| CD003167 <sup>W43</sup> | CSR                 | Glaucoma and ocular hypertension | A: Betaxolol;<br>B: Timolol;<br>C: Placebo                                       | unclear                 | Drop-out due to drug-related adverse events       | 0                                       | 3             | 1   | 2   |
| CD003187 <sup>W44</sup> | CSR                 | Hodgkin's disease-early stage    | A: Radiotherapy;<br>B: Chemotherapy;<br>C: Combined chemo-radiotherapy           | unclear                 | Overall mortality                                 | 1                                       | 2             | 11  | 3   |
| CD003209 <sup>W45</sup> | CSR                 | Distal radial fractures          | A: Percutaneous pinning;<br>B: External fixation;<br>C: Plaster cast             | unclear                 | Functional grading - not excellent                | 0                                       | 2             | 4   | 8   |
| CD003226 <sup>W46</sup> | CSR                 | Migraine                         | A: Topiramate 200mg;<br>B: Topiramate 100mg;<br>C: Placebo                       | A: more intense         | No 50% or greater reduction in migraine frequency | 1                                       | 3             | 1   | 2   |
| CD003245 <sup>W47</sup> | CSR                 | Reflux disease                   | A: PPI;<br>B: H2 RA;<br>C: Placebo                                               | A: newer                | Relapse (oesophagitis)                            | 0                                       | 10            | 9   | 4   |
| CD003261 <sup>W48</sup> | CSR                 | Impetigo                         | A: Mupirocin;<br>B: Fusidic acid;<br>C: Placebo                                  | A: newer                | No cure/improvement                               | 0                                       | 4             | 3   | 1   |

| Cases                   | Source <sup>ξ</sup> | Disease category                      | Intervention A, B, C                                                         | A newer or more intense | Outcome measures                              | Outcome:<br>Objective=1<br>subjective=0 | No. of trials |     |     |
|-------------------------|---------------------|---------------------------------------|------------------------------------------------------------------------------|-------------------------|-----------------------------------------------|-----------------------------------------|---------------|-----|-----|
|                         |                     |                                       |                                                                              |                         |                                               |                                         | AvB           | AvC | BvC |
| CD003262 <sup>W49</sup> | CSR                 | Rosacea                               | A: Topical azelaic acid;<br>B: Topical metronidazole;<br>C: Placebo          | A: newer                | Pphysician's global evaluation of improvement | 0                                       | 1             | 3   | 3   |
| CD003352 <sup>W50</sup> | CSR                 | Cocaine dependence                    | A: Amantadine;<br>B: Bromocriptine;<br>C: Placebo                            | unclear                 | Positive urine sample for cocaine metabolites | 1                                       | 1             | 1   | 1   |
| CD003370 <sup>W51</sup> | CSR                 | Advanced breast cancer                | A: Aminoglutethimide;<br>B: Letrozole;<br>C: non-AI                          | A: newer                | No clinical benefit (assessable)              | 1                                       | 1             | 4   | 5   |
| CD003385 <sup>W52</sup> | CSR                 | Bulimia Nervosa                       | A: Antidepressant + Psychotherapy;<br>B: Antidepressant;<br>C: Psychotherapy | A: more intense         | Remission                                     | 1                                       | 4             | 1   | 2   |
| CD003388 <sup>W53</sup> | CSR                 | Post traumatic stress disorder (PTSD) | A: EMDR;<br>B: TFCBT;<br>C: Waiting list/usual care                          | unclear                 | PTSD diagnosis after treatment                | 0                                       | 7             | 3   | 12  |
| CD003431 <sup>W54</sup> | CSR                 | Anal fissure                          | A: Botox;<br>B: Nitroglycerin ointment (GTN);<br>C: Placebo                  | A: newer                | Non-healing                                   | 1                                       | 4             | 3   | 15  |
| CD003584 <sup>W55</sup> | CSR                 | Tinea pedis                           | A: Terbinafine;<br>B: Itraconazole;<br>C: Placebo                            | A: newer                | No cure (week 8)                              | 1                                       | 3             | 1   | 1   |
| CD003592 <sup>W56</sup> | CSR                 | Anxiety disorder                      | A: Paroxetine;<br>B: Imipramine;<br>C: Placebo                               | A: newer                | No treatment response                         | 0                                       | 1             | 1   | 1   |

| Cases                   | Source <sup>§</sup> | Disease category                        | Intervention A, B, C                                                                              | A newer or more intense | Outcome measures            | Outcome:<br>Objective=1<br>subjective=0 | No. of trials |     |     |
|-------------------------|---------------------|-----------------------------------------|---------------------------------------------------------------------------------------------------|-------------------------|-----------------------------|-----------------------------------------|---------------|-----|-----|
|                         |                     |                                         |                                                                                                   |                         |                             |                                         | AvB           | AvC | BvC |
| CD003664 <sup>W57</sup> | CSR                 | Allergy and food intolerance in infants | A: Extensively hydrolysed formula;<br>B: Cow's milk formula;<br>C: Partially hydrolysed formula   | A: more intense         | Any allergy                 | 1                                       | 2             | 1   | 5   |
| CD003723 <sup>W58</sup> | CSR                 | Status epilepticus                      | A: Lorazepam;<br>B: Diazepam;<br>C: Midazolam                                                     | unclear                 | Non-cessation of seizures   | 1                                       | 3             | 1   | 1   |
| CD003738 <sup>W59</sup> | CSR                 | Cataract                                | A: PMMA (polymethyl methacrylate);<br>B: Silicone;<br>C: Acrylic                                  | unclear                 | YAG rate                    | 1                                       | 4             | 2   | 5   |
| CD003774 <sup>W60</sup> | CSR                 | Solid organ transplant recipients       | A: Ganciclovir;<br>B: Aciclovir;<br>C: Placebo                                                    | A: newer                | CMV organ involvement       | 1                                       | 7             | 7   | 3   |
| CD003807 <sup>W61</sup> | CSR                 | Oral candidiasis in cancer patients     | A: Drugs absorbed from GI tract;<br>B: Drugs not absorbed from GI;<br>C: Placebo or no treatment. | unclear                 | Oral candidiasis present    | 1                                       | 8             | 6   | 7   |
| CD003827 <sup>W62</sup> | CSR                 | Central venous catheters required       | A: Gauze & tape;<br>B: Highly Perm TP;<br>C: Transparent PU dressing                              | unclear                 | Catheter related sepsis     | 1                                       | 2             | 1   | 1   |
| CD003842 <sup>W63</sup> | CSR                 | Axillary brachial plexus block          | A: Multiple injection;<br>B: Double injection;<br>C: Single injection                             | A: more intense         | Primary anaesthesia failure | 1                                       | 4             | 1   | 1   |
| CD003940 <sup>W64</sup> | CSR                 | Oropharyngeal candidiasis               | A: Fluconazole;<br>B: Clotrimazole;<br>C: Itraconazole                                            | unclear                 | Mycological cure            | 1                                       | 2             | 3   | 1   |



| Cases                   | Source <sup>ξ</sup> | Disease category                                     | Intervention A, B, C                                                                      | A newer or more intense | Outcome measures                             | Outcome:<br>Objective=1<br>subjective=0 | No. of trials |     |     |
|-------------------------|---------------------|------------------------------------------------------|-------------------------------------------------------------------------------------------|-------------------------|----------------------------------------------|-----------------------------------------|---------------|-----|-----|
|                         |                     |                                                      |                                                                                           |                         |                                              |                                         | AvB           | AvC | BvC |
| CD004291 <sup>W65</sup> | CSR                 | Organ transplant                                     | A: Fluconazole;<br>B: Itraconazole;<br>C: Control                                         | unclear                 | Mortality                                    | 1                                       | 1             | 4   | 2   |
| CD004293 <sup>W66</sup> | CSR                 | Nephropathy                                          | A: Alkylating agents;<br>B: Steroids;<br>C: Placebo/no treatment                          | unclear                 | End-stage renal failure or death             | 1                                       | 3             | 3   | 3   |
| CD004379 <sup>W67</sup> | CSR                 | Poor responders to ovarian hyperstimulation          | A: GnRH antagonist;<br>B: GnRH Flare up protocol;<br>C: Conventional GnRHa long protocol  | unclear                 | Pregnancy                                    | 1                                       | 2             | 1   | 1   |
| CD004386 <sup>W68</sup> | CSR                 | Afebrile neutropenic patients following chemotherapy | A: Quinolones;<br>B: TMP-SMZ (trimethoprim-sulfamethoxole);<br>C: Placebo or no treatment | A: newer                | All cause mortality                          | 1                                       | 10            | 14  | 14  |
| CD004610 <sup>W69</sup> | CSR                 | Diarrhoea                                            | A: Teicoplanin;<br>B: Metronidazole;<br>C: Vancomycin                                     | A: newer                | No symptomatic Initial Response              | 1                                       | 1             | 1   | 1   |
| CD004618 <sup>W70</sup> | CSR                 | Chronic suppurative otitis media                     | A: Topical quinolone;<br>B: Topical non-quinolone;<br>C: Topical antiseptic               | A: newer                | Not discharged at 2-4 weeks                  | 1                                       | 6             | 2   | 2   |
| CD004679 <sup>W71</sup> | CSR                 | Peritoneal dialysis                                  | A: Mupirocin;<br>B: Rifampin;<br>C: Control                                               | A: newer                | Number of patients with Peritonitis          | 1                                       | 1             | 1   | 1   |
| CD004756 <sup>W72</sup> | CSR                 | Acute rejection in kidney transplant                 | A: Anti-thymocyte globulin (ATG);<br>B: Muromonab-CD3;<br>C: Steroid                      | unclear                 | Failure of reversal of acute first rejection | 1                                       | 1             | 3   | 1   |

| Cases                   | Source <sup>§</sup> | Disease category                                        | Intervention A, B, C                                                                         | A newer or more intense | Outcome measures                             | Outcome:<br>Objective=1<br>subjective=0 | No. of trials |     |     |
|-------------------------|---------------------|---------------------------------------------------------|----------------------------------------------------------------------------------------------|-------------------------|----------------------------------------------|-----------------------------------------|---------------|-----|-----|
|                         |                     |                                                         |                                                                                              |                         |                                              |                                         | AvB           | AvC | BvC |
| CD004785 <sup>W73</sup> | CSR                 | Meningococcal carrier                                   | A: Ciprofloxacin;<br>B: Rifampin;<br>C: Placebo                                              | A: newer                | Failure to eradicate<br>(one week follow up) | 1                                       | 2             | 6   | 3   |
| CD004790 <sup>W74</sup> | CSR                 | Infants of hepatitis B surface antigen-positive mothers | A: RV;<br>B: PDV;<br>C: Control                                                              | unclear                 | HB event                                     | 1                                       | 2             | 1   | 3   |
| CD004861 <sup>W75</sup> | CSR                 | Oral contraception                                      | A: Levonorgestrel;<br>B: Norethindrone (monophasic);<br>C: Gestodene                         | unclear                 | Discontinuation                              | 0                                       | 2             | 2   | 1   |
| CD004879 <sup>W76</sup> | CSR                 | Preventing influenza in healthy children                | A: Live attenuated vaccines (one dose);<br>B: Inactivated vaccines (one dose);<br>C: Placebo | unclear                 | Influenza                                    | 1                                       | 2             | 2   | 3   |
| CD005015 <sup>W77</sup> | CSR                 | Kidney transplant recipients                            | A: Bisphosphonate;<br>B: Vit D sterol;<br>C: Placebo or no treatment                         | A: newer                | Change in BMD at lumbar spine                | 1                                       | 1             | 3   | 1   |
| CD005049 <sup>W78</sup> | CSR                 | Cardioversion of atrial fibrillation                    | A: Amiodarone;<br>B: Sotalol;<br>C: Placebo                                                  | unclear                 | Atrial fibrillation recurrence               | 1                                       | 3             | 2   | 7   |
| CD005115 <sup>W79</sup> | CSR                 | Osteoarthritis                                          | A: Rofecoxib 25mg;<br>B: Rofecoxib 12.5 mg;<br>C: Placebo                                    | A: more intense         | Diarrhoea (adverse effect) 6 weeks           | 1                                       | 4             | 3   | 1   |
| CD005129 <sup>W80</sup> | CSR                 | Organ transplant recipients                             | A: IgC;<br>B: CMV IgG;<br>C: Placebo/no treatment                                            | unclear                 | Cytomegalovirus (CMV) disease                | 1                                       | 1             | 11  | 5   |

| Cases                    | Source <sup>§</sup> | Disease category                   | Intervention A, B, C                                                               | A newer or more intense | Outcome measures                   | Outcome:<br>Objective=1<br>subjective=0 | No. of trials |     |     |
|--------------------------|---------------------|------------------------------------|------------------------------------------------------------------------------------|-------------------------|------------------------------------|-----------------------------------------|---------------|-----|-----|
|                          |                     |                                    |                                                                                    |                         |                                    |                                         | AvB           | AvC | BvC |
| CD005149 <sup>W81</sup>  | CSR                 | Acute sinusitis                    | A: Mometasone 400 mcg;<br>B: Mometasone 200 mcg;<br>C: Placebo                     | A: more intense         | Resolution of symptoms or improved | 1                                       | 1             | 1   | 1   |
| CD005351 <sup>W82</sup>  | CSR                 | Cardiogenic pulmonary oedema       | A: Bilevel;<br>B: Continuous positive airway pressure;<br>C: Standard medical care | unclear                 | Hospital mortality                 | 1                                       | 6             | 9   | 4   |
| CD006003 <sup>W83</sup>  | CSR                 | Uncomplicated open cholecystectomy | A: Passive open drain;<br>B: Suction drain;<br>C: no drain                         | unclear                 | Wound infection                    | 1                                       | 1             | 6   | 4   |
| CD006257 <sup>W84</sup>  | CSR                 | Diabetic kidney disease            | A: AIIRA;<br>B: ACEi;<br>C: Placebo or no treatment                                | A: newer                | All cause mortality                | 1                                       | 1             | 3   | 9   |
| ATC-I -2 <sup>W85</sup>  | Other               | Risk of vascular disease           | A: Aspirin+Dipyridamole;<br>B: Aspirin;<br>C: Control                              | A: added                | Vascular event                     | 0                                       | 16            | 42  | 23  |
| ATC-II- 2 <sup>W86</sup> | Other               | Vascular occlusion                 | A: Aspirin+Dipyridamole;<br>B: Aspirin;<br>C: Control                              | A: added                | Vasc. occlusion                    | 0                                       | 10            | 7   | 14  |
| ATC-III <sup>W87</sup>   | Other               | High risk of DVT                   | A: Aspirin+Dipyridamole;<br>B: Aspirin;<br>C: Control                              | A: added                | DVT                                | 1                                       | 9             | 11  | 9   |

| Cases                      | Source <sup>ξ</sup> | Disease category                    | Intervention A, B, C                                                                                                                 | A newer or more intense | Outcome measures     | Outcome:<br>Objective=1<br>subjective=0 | No. of trials |     |     |
|----------------------------|---------------------|-------------------------------------|--------------------------------------------------------------------------------------------------------------------------------------|-------------------------|----------------------|-----------------------------------------|---------------|-----|-----|
|                            |                     |                                     |                                                                                                                                      |                         |                      |                                         | AvB           | AvC | BvC |
| Ballesteros <sup>W88</sup> | PubMed              | Dysthymia                           | A: SSRIs;<br>B: TCAs;<br>C: Placebo                                                                                                  | A: newer                | No clinical response | 0                                       | 1             | 4   | 3   |
| Brophy <sup>W89</sup>      | PubMed              | Percutaneous coronary interventions | A: Abciximab;<br>B: Tirofiban;<br>C: Placebo                                                                                         | A: newer                | Death+MI             | 1                                       | 1             | 8   | 1   |
| Bucher <sup>W90</sup>      | Other               | HIV-infected patients               | A: TMP+SMX (trimethoprim-sulfamethoxazole);<br>B: Dapsone+P (dapsone or dapsonel/ pyrimethamine);<br>C: AP (aerosolized pentamidine) | Unclear                 | p.c. pneumonia       | 1                                       | 8             | 9   | 5   |
| Chou <sup>W91</sup>        | PubMed              | HIV-infected patients               | A: NNRTI-based HAART;<br>B: PI-based HAART;<br>C: NRTI                                                                               | Unclear                 | Death+ progression   | 1                                       | 11            | 5   | 4   |
| Cooper <sup>W92</sup>      | PubMed              | Nonrheumatic atrial fibrillation    | A: Standard warfarin;<br>B: Aspirin;<br>C: Placebo                                                                                   | A: more intense         | Ischemic stroke      | 1                                       | 7             | 1   | 1   |
| JCE08-1 <sup>W93</sup>     | PubMed              | Schizophrenia                       | A: Risperidone;<br>B: Haloperidol;<br>C: Placebo                                                                                     | A: newer                | Dropout              | 0                                       | 13            | 3   | 11  |

| Cases                   | Source <sup>ξ</sup> | Disease category      | Intervention A, B, C                                                                   | A newer or more intense | Outcome measures      | Outcome:<br>Objective=1<br>subjective=0 | No. of trials |     |     |
|-------------------------|---------------------|-----------------------|----------------------------------------------------------------------------------------|-------------------------|-----------------------|-----------------------------------------|---------------|-----|-----|
|                         |                     |                       |                                                                                        |                         |                       |                                         | AvB           | AvC | BvC |
| JCE08-2 <sup>W93</sup>  | PubMed              | Depression            | A: Fluoxetine;<br>B: Imipramine;<br>C: Placebo                                         | A: newer                | Dropout               | 0                                       | 13            | 14  | 39  |
| Lam <sup>W94</sup>      | PubMed              | Heart disease         | A: Resynchr+ Defibril;<br>B: Defibri;<br>C: Medical                                    | A: added                | Death                 | 1                                       | 3             | 4   | 4   |
| Marshall <sup>W95</sup> | Other               | Ulcerative colitis    | A: Rectal 5-aminosalicylic acid;<br>B: Rectal corticosteroids;<br>C: Rectal budesonide | Unclear                 | Endoscopic remission  | 1                                       | 7             | 2   | 5   |
| Mason <sup>W96</sup>    | PubMed              | Acute pain            | A: Indomethacin;<br>B: Piroxicam;<br>C: Placebo                                        | A: newer                | No pain relief        | 0                                       | 3             | 1   | 1   |
| Moore <sup>W97</sup>    | Other               | Postoperative pain    | A: Paracetamol+Codeine;<br>B: Paracetamol;<br>C: Placebo                               | A: added                | No pain relief        | 0                                       | 10            | 5   | 7   |
| Pagliari <sup>W98</sup> | Other               | Cirrhosis, E. varices | A: Paracetamol+Codeine;<br>B: Paracetamol;<br>C: Placebo                               | A: added                | First bleeding        | 1                                       | 2             | 7   | 17  |
| Poynard <sup>W99</sup>  | Other               | Viral hepatitis C     | A: Interferon 12mon;<br>B: Interferon 6mon;<br>C: Control                              | A: more intense         | No sustained response | 1                                       | 4             | 5   | 6   |

| Cases                    | Source <sup>ξ</sup> | Disease category                       | Intervention A, B, C                                                               | A newer or more intense | Outcome measures | Outcome:<br>Objective=1<br>subjective=0 | No. of trials |     |     |
|--------------------------|---------------------|----------------------------------------|------------------------------------------------------------------------------------|-------------------------|------------------|-----------------------------------------|---------------|-----|-----|
|                          |                     |                                        |                                                                                    |                         |                  |                                         | AvB           | AvC | BvC |
| Psaty <sup>W100</sup>    | PubMed              | Hypertension                           | A: Calcium channel blocker;<br>B: Low dose diuretics;<br>C: Placebo                | A: newer                | Death            | 1                                       | 5             | 2   | 5   |
| Small <sup>W101</sup>    | PubMed              | CMV infection in organ transplantation | A: Preemptive ganciclovir;<br>B: Prophylactic ganciclovir;<br>C: Mixed active      | Unclear                 | CMV disease      | 1                                       | 1             | 9   | 16  |
| Soares <sup>W50</sup>    | PubMed              | Bipolar disorder                       | A: Valproate;<br>B: Lithium;<br>C: Olanzapine                                      | A: newer                | Relapse          | 1                                       | 2             | 1   | 1   |
| Stettler <sup>W102</sup> | PubMed              | Coronary artery disease                | A: Sirolimus-eluting stent;<br>B: Paclitaxel-eluting stent;<br>C: Bare-metal stent | Unclear                 | Death+ MI        | 1                                       | 15            | 16  | 7   |
| SWI-02 <sup>W103</sup>   | PubMed              | Surgical wound infection               | A: Cefuroxime+ Metronidazole;<br>B: Metronidazole;<br>C: Ampicillin+ Metronidazole | A: newer                | Wound infection  | 1                                       | 4             | 1   | 2   |
| SWI-06 <sup>W103</sup>   | PubMed              | Surgical wound infection               | A: Mezlocillin;<br>B: Timentin;<br>C: Cefotaxime                                   | Unclear                 | Wound infection  | 1                                       | 1             | 1   | 1   |
| SWI-07 <sup>W103</sup>   | PubMed              | Surgical wound infection               | A: Cefotetan;<br>B: Cefoxitin;<br>C: Piperacillin                                  | Unclear                 | Wound infection  | 1                                       | 2             | 1   | 1   |

| Cases                    | Source <sup>§</sup> | Disease category         | Intervention A, B, C                                                                  | A newer or more intense | Outcome measures | Outcome:<br>Objective=1<br>subjective=0 | No. of trials |     |     |
|--------------------------|---------------------|--------------------------|---------------------------------------------------------------------------------------|-------------------------|------------------|-----------------------------------------|---------------|-----|-----|
|                          |                     |                          |                                                                                       |                         |                  |                                         | AvB           | AvC | BvC |
| SWI-10 <sup>W103</sup>   | PubMed              | Surgical wound infection | A: Ciprofloxacin+<br>Metronidazole;<br>B: Gentamicin+<br>Metronidazole;<br>C: Moxalac | A: newer                | Wound infection  | 1                                       | 1             | 1   | 1   |
| Trinidad <sup>W104</sup> | Other               | Depression               | A: Paroxetine;<br>B: Fluvoxamine;<br>C: Placebo+active                                | A: newer                | Dropout          | 0                                       | 1             | 8   | 12  |
| Wu <sup>W105</sup>       | PubMed              | Smoking                  | A: Varenicline;<br>B: Bupropion;<br>C: Placebo                                        | A: newer                | Smoking          | 1                                       | 3             | 1   | 9   |
| Zhang <sup>W106</sup>    | Other               | Dysmenorrhoea            | A: Naproxen;<br>B: Ibuprofen;<br>C: Placebo                                           | A: newer                | No pain relief   | 0                                       | 3             | 17  | 10  |

### **Notes to Appendix 3:**

ξ - CSR refers to Cochrane Database of Systematic Reviews; and Other refers to two previous studies.

Outcomes are classified using methods by Wood et al (Wood L, Egger M, Gluud LL, et al. Empirical evidence of bias in treatment effect estimates in controlled trials with different interventions and outcomes: meta-epidemiological study. *BMJ*. 2008 Mar 15;336(7644):601-5.2008): “The definition of objective and subjective outcomes was based on the extent to which outcome assessment could be influenced by investigators’ judgment. Objectively assessed outcomes included all cause mortality, measures based on a recognised laboratory procedure (such as measurement of haemoglobin concentrations), other objective measures (such as preterm birth), and surgical or instrumental outcomes (all of these were concerned with childbirth, such as caesarean section or instrumental delivery). Note that such surgical outcomes (classified as objectively assessed) depend on doctors’ decisions, which could, in the absence of blinding, be affected by knowledge of the intervention received.”

“Subjectively assessed outcome measures included patient reported outcomes, physician assessed disease outcomes (such as vascular events, pyelonephritis, or respiratory distress syndrome), measures combined from several outcomes, and withdrawals or study dropouts.”

### **References to Appendix 3 (sources of included trial-networks)**

- W1. Danso-Appiah A, Utzinger J, Liu J, Olliaro P. Drugs for treating urinary schistosomiasis. *Cochrane Database Syst Rev* 2008(3):CD000053.
- W2. Stead LF, Perera R, Bullen C, Mant D, Lancaster T. Nicotine replacement therapy for smoking cessation. *Cochrane Database Syst Rev* 2008(1):CD000146.
- W3. Stead LF, Bergson G, Lancaster T. Physician advice for smoking cessation. *Cochrane Database Syst Rev* 2008(2):CD000165.



- W4. Hofmeyr GJ. Interventions to help external cephalic version for breech presentation at term. *Cochrane Database Syst Rev* 2004(1):CD000184.
- W5. Rowe BH, Spooner CH, Ducharme FM, Bretzlaff JA, Bota GW. Corticosteroids for preventing relapse following acute exacerbations of asthma. *Cochrane Database Syst Rev* 2007(3):CD000195.
- W6. Forna F, Gulmezoglu AM. Interventions for treating trichomoniasis in women. *Cochrane Database Syst Rev* 2003(2):CD000218.
- W7. Avenell A, Gillespie WJ, Gillespie LD, O'Connell D. Vitamin D and vitamin D analogues for preventing fractures associated with involutional and post-menopausal osteoporosis. *Cochrane Database Syst Rev* 2009(2):CD000227.
- W8. McIntosh HM, Olliaro P. Artemisinin derivatives for treating uncomplicated malaria. *Cochrane Database Syst Rev* 2000(2):CD000256.
- W9. Handoll HH, Farrar MJ, McBirnie J, Tytherleigh-Strong G, Milne AA, Gillespie WJ. Heparin, low molecular weight heparin and physical methods for preventing deep vein thrombosis and pulmonary embolism following surgery for hip fractures. *Cochrane Database Syst Rev* 2002(4):CD000305.
- W10. David A, Adams CE, Eisenbruch M, Quraishi S, Rathbone J. Depot fluphenazine decanoate and enanthate for schizophrenia. *Cochrane Database Syst Rev* 2005(1):CD000307.
- W11. Strong M, Johnstone PW. Interventions for treating scabies. *Cochrane Database Syst Rev* 2007(3):CD000320.
- W12. Furness S, Roberts H, Marjoribanks J, Lethaby A, Hickey M, Farquhar C. Hormone therapy in postmenopausal women and risk of endometrial hyperplasia. *Cochrane Database Syst Rev* 2009(2):CD000402.
- W13. McIntosh HM, Olliaro P. Artemisinin derivatives for treating severe malaria. *Cochrane Database Syst Rev* 2000(2):CD000527.
- W14. Palfreyman SJ, Nelson EA, Lochiel R, Michaels JA. Dressings for healing venous leg ulcers. *Cochrane Database Syst Rev* 2006;3:CD001103.
- W15. Hopkins L, Smaill F. Antibiotic prophylaxis regimens and drugs for cesarean section. *Cochrane Database Syst Rev* 2000(2):CD001136.
- W16. Jefferson T, Demicheli V, Di Pietrantonj C, Rivetti D. Amantadine and rimantadine for influenza A in adults. *Cochrane Database Syst Rev* 2006(2):CD001169.
- W17. Birks J, Harvey RJ. Donepezil for dementia due to Alzheimer's disease. *Cochrane Database Syst Rev* 2006(1):CD001190.
- W18. Albert X, Huertas I, Pereiro, II, Sanfelix J, Gosalbes V, Perrota C. Antibiotics for preventing recurrent urinary tract infection in non-pregnant women. *Cochrane Database Syst Rev* 2004(3):CD001209.
- W19. Wille-Jorgensen P, Rasmussen MS, Andersen BR, Borly L. Heparins and mechanical methods for thromboprophylaxis in colorectal surgery. *Cochrane Database Syst Rev* 2003(4):CD001217.
- W20. Bunn F, Trivedi D, Ashraf S. Colloid solutions for fluid resuscitation. *Cochrane Database Syst Rev* 2008(1):CD001319.
- W21. Cheng L, Gulmezoglu AM, Piaggio G, Ezcurra E, Van Look PF. Interventions for emergency contraception. *Cochrane Database Syst Rev* 2008(2):CD001324.

- W22. Crawford F, Hollis S. Topical treatments for fungal infections of the skin and nails of the foot. *Cochrane Database Syst Rev* 2007(3):CD001434.
- W23. Duley L, Henderson-Smart DJ, Meher S. Drugs for treatment of very high blood pressure during pregnancy. *Cochrane Database Syst Rev* 2006;3:CD001449.
- W24. Lethaby A, Hickey M, Garry R, Penninx J. Endometrial resection / ablation techniques for heavy menstrual bleeding. *Cochrane Database Syst Rev* 2009(4):CD001501.
- W25. Lutters M, Vogt-Ferrier NB. Antibiotic duration for treating uncomplicated, symptomatic lower urinary tract infections in elderly women. *Cochrane Database Syst Rev* 2008(3):CD001535.
- W26. Marjoribanks J, Proctor M, Farquhar C, Derks RS. Nonsteroidal anti-inflammatory drugs for dysmenorrhoea. *Cochrane Database Syst Rev* (1):CD001751.
- W27. Gibbs S, Harvey I. Topical treatments for cutaneous warts. *Cochrane Database Syst Rev* 2006;3:CD001781.
- W28. Samuel M, Brooke RC, Hollis S, Griffiths CE. Interventions for photodamaged skin. *Cochrane Database Syst Rev* 2005(1):CD001782.
- W29. Henry DA, Carless PA, Moxey AJ, O'Connell D, Stokes BJ, McClelland B, et al. Anti-fibrinolytic use for minimising perioperative allogeneic blood transfusion. *Cochrane Database Syst Rev* 2007(4):CD001886.
- W30. Proctor ML, Latthe PM, Farquhar CM, Khan KS, Johnson NP. Surgical interruption of pelvic nerve pathways for primary and secondary dysmenorrhoea. *Cochrane Database Syst Rev* 2005(4):CD001896.
- W31. Waraich PS, Adams CE, Roque M, Hamill KM, Marti J. Haloperidol dose for the acute phase of schizophrenia. *Cochrane Database Syst Rev* 2002(3):CD001951.
- W32. Moayyedi P, Soo S, Deeks J, Delaney B, Innes M, Forman D. Pharmacological interventions for non-ulcer dyspepsia. *Cochrane Database Syst Rev* 2006(4):CD001960.
- W33. Delaney B, Ford AC, Forman D, Moayyedi P, Qume M. Initial management strategies for dyspepsia. *Cochrane Database Syst Rev* 2005(4):CD001961.
- W34. van Pinxteren B, Numans ME, Bonis PA, Lau J. Short-term treatment with proton pump inhibitors, H2-receptor antagonists and prokinetics for gastro-oesophageal reflux disease-like symptoms and endoscopy negative reflux disease. *Cochrane Database Syst Rev* 2006;3:CD002095.
- W35. Proctor ML, Smith CA, Farquhar CM, Stones RW. Transcutaneous electrical nerve stimulation and acupuncture for primary dysmenorrhoea. *Cochrane Database Syst Rev* 2002(1):CD002123.
- W36. Cyna AM, Andrew M, Emmett RS, Middleton P, Simmons SW. Techniques for preventing hypotension during spinal anaesthesia for caesarean section. *Cochrane Database Syst Rev* 2006(4):CD002251.
- W37. Abalos E, Duley L, Steyn DW, Henderson-Smart DJ. Antihypertensive drug therapy for mild to moderate hypertension during pregnancy. *Cochrane Database Syst Rev* 2007(1):CD002252.
- W38. Rostom A, Dube C, Wells G, Tugwell P, Welch V, Jolicoeur E, et al. Prevention of NSAID-induced gastroduodenal ulcers. *Cochrane Database Syst Rev* 2002(4):CD002296.
- W39. Marinho VC, Higgins JP, Sheiham A, Logan S. One topical fluoride (toothpastes, or mouthrinses, or gels, or varnishes) versus another for preventing dental caries in children and adolescents. *Cochrane Database Syst Rev* 2004(1):CD002780.

- W40. Wilhelmus KR. Therapeutic interventions for herpes simplex virus epithelial keratitis. *Cochrane Database Syst Rev* 2008(1):CD002898.
- W41. Shaw P, Agarwal R. Pleurodesis for malignant pleural effusions. *Cochrane Database Syst Rev* 2004(1):CD002916.
- W42. Kelly AJ, Malik S, Smith L, Kavanagh J, Thomas J. Vaginal prostaglandin (PGE2 and PGF2a) for induction of labour at term. *Cochrane Database Syst Rev* 2009(4):CD003101.
- W43. Vass C, Hirn C, Sycha T, Findl O, Bauer P, Schmetterer L. Medical interventions for primary open angle glaucoma and ocular hypertension. *Cochrane Database Syst Rev* 2007(4):CD003167.
- W44. Franklin JG, Paus MD, Pluetschow A, Specht L. Chemotherapy, radiotherapy and combined modality for Hodgkin's disease, with emphasis on second cancer risk. *Cochrane Database Syst Rev* 2005(4):CD003187.
- W45. Handoll HH, Madhok R. Surgical interventions for treating distal radial fractures in adults. *Cochrane Database Syst Rev* 2003(3):CD003209.
- W46. Chronicle E, Mulleners W. Anticonvulsant drugs for migraine prophylaxis. *Cochrane Database Syst Rev* 2004(3):CD003226.
- W47. Donnellan C, Sharma N, Preston C, Moayyedi P. Medical treatments for the maintenance therapy of reflux oesophagitis and endoscopic negative reflux disease. *Cochrane Database Syst Rev* 2005(2):CD003245.
- W48. Koning S, Verhagen AP, van Suijlekom-Smit LW, Morris A, Butler CC, van der Wouden JC. Interventions for impetigo. *Cochrane Database Syst Rev* 2004(2):CD003261.
- W49. van Zuuren EJ, Graber MA, Hollis S, Chaudhry M, Gupta AK, Gover M. Interventions for rosacea. *Cochrane Database Syst Rev* 2005(3):CD003262.
- W50. Soares BG, Lima MS, Reisser AA, Farrell M. Dopamine agonists for cocaine dependence. *Cochrane Database Syst Rev* 2003(2):CD003352.
- W51. Gibson L, Lawrence D, Dawson C, Bliss J. Aromatase inhibitors for treatment of advanced breast cancer in postmenopausal women. *Cochrane Database Syst Rev* 2009(4):CD003370.
- W52. Bacaltchuk J, Hay P, Trefiglio R. Antidepressants versus psychological treatments and their combination for bulimia nervosa. *Cochrane Database Syst Rev* 2001(4):CD003385.
- W53. Bisson J, Andrew M. Psychological treatment of post-traumatic stress disorder (PTSD). *Cochrane Database Syst Rev* 2007(3):CD003388.
- W54. Nelson R. Non surgical therapy for anal fissure. *Cochrane Database Syst Rev* 2006(4):CD003431.
- W55. Bell-Syer SE, Hart R, Crawford F, Torgerson DJ, Tyrrell W, Russell I. Oral treatments for fungal infections of the skin of the foot. *Cochrane Database Syst Rev* 2002(2):CD003584.
- W56. Kapczinski F, Lima MS, Souza JS, Schmitt R. Antidepressants for generalized anxiety disorder. *Cochrane Database Syst Rev* 2003(2):CD003592.
- W57. Osborn DA, Sinn J. Formulas containing hydrolysed protein for prevention of allergy and food intolerance in infants. *Cochrane Database Syst Rev* 2006(4):CD003664.
- W58. Prasad K, Al-Roomi K, Krishnan PR, Sequeira R. Anticonvulsant therapy for status epilepticus. *Cochrane Database Syst Rev* 2005(4):CD003723.
- W59. Findl O, Buehl W, Bauer P, Sycha T. Interventions for preventing posterior capsule opacification. *Cochrane Database Syst Rev*;2:CD003738.

- W60. Hodson EM, Craig JC, Strippoli GF, Webster AC. Antiviral medications for preventing cytomegalovirus disease in solid organ transplant recipients. *Cochrane Database Syst Rev* 2008(2):CD003774.
- W61. Clarkson JE, Worthington HV, Eden OB. Interventions for preventing oral candidiasis for patients with cancer receiving treatment. *Cochrane Database Syst Rev* 2007(1):CD003807.
- W62. Gillies D, O'Riordan L, Carr D, Frost J, Gunning R, O'Brien I. Gauze and tape and transparent polyurethane dressings for central venous catheters. *Cochrane Database Syst Rev* 2003(4):CD003827.
- W63. Handoll HH, Koscielniak-Nielsen ZJ. Single, double or multiple injection techniques for axillary brachial plexus block for hand, wrist or forearm surgery. *Cochrane Database Syst Rev* 2006(1):CD003842.
- W64. Pienaar ED, Young T, Holmes H. Interventions for the prevention and management of oropharyngeal candidiasis associated with HIV infection in adults and children. *Cochrane Database Syst Rev* 2006;3:CD003940.
- W65. Playford EG, Webster AC, Sorell TC, Craig JC. Antifungal agents for preventing fungal infections in solid organ transplant recipients. *Cochrane Database Syst Rev* 2004(3):CD004291.
- W66. Schieppati A, Perna A, Zamora J, Giuliano GA, Braun N, Remuzzi G. Immunosuppressive treatment for idiopathic membranous nephropathy in adults with nephrotic syndrome. *Cochrane Database Syst Rev* 2004(4):CD004293.
- W67. Pandian Z, McTavish AR, Aucott L, Hamilton MP, Bhattacharya S. Interventions for 'poor responders' to controlled ovarian hyper stimulation (COH) in in-vitro fertilisation (IVF). *Cochrane Database Syst Rev* (1):CD004379.
- W68. Gafter-Gvili A, Fraser A, Paul M, van de Wetering M, Kremer L, Leibovici L. Antibiotic prophylaxis for bacterial infections in afebrile neutropenic patients following chemotherapy. *Cochrane Database Syst Rev* 2005(4):CD004386.
- W69. Nelson R. Antibiotic treatment for *Clostridium difficile*-associated diarrhea in adults. *Cochrane Database Syst Rev* 2007(3):CD004610.
- W70. Macfadyen CA, Acuin JM, Gamble C. Topical antibiotics without steroids for chronically discharging ears with underlying eardrum perforations. *Cochrane Database Syst Rev* 2005(4):CD004618.
- W71. Strippoli GF, Tong A, Johnson D, Schena FP, Craig JC. Antimicrobial agents for preventing peritonitis in peritoneal dialysis patients. *Cochrane Database Syst Rev* 2004(4):CD004679.
- W72. Webster A, Pankhurst T, Rinaldi F, Chapman JR, Craig JC. Polyclonal and monoclonal antibodies for treating acute rejection episodes in kidney transplant recipients. *Cochrane Database Syst Rev* 2006(2):CD004756.
- W73. Fraser A, Gafter-Gvili A, Paul M, Leibovici L. Antibiotics for preventing meningococcal infections. *Cochrane Database Syst Rev* 2006(4):CD004785.
- W74. Lee C, Gong Y, Brok J, Boxall EH, Glud C. Hepatitis B immunisation for newborn infants of hepatitis B surface antigen-positive mothers. *Cochrane Database Syst Rev* 2006(2):CD004790.
- W75. Maitra N, Kulier R, Bloemenkamp KW, Helmerhorst FM, Gulmezoglu AM. Progestogens in combined oral contraceptives for contraception. *Cochrane Database Syst Rev* 2004(3):CD004861.
- W76. Jefferson T, Rivetti A, Harnden A, Di Pietrantonj C, Demicheli V. Vaccines for preventing influenza in healthy children. *Cochrane Database Syst Rev* 2008(2):CD004879.

- W77. Palmer SC, McGregor DO, Strippoli GF. Interventions for preventing bone disease in kidney transplant recipients. *Cochrane Database Syst Rev* 2007(3):CD005015.
- W78. Lafuente-Lafuente C, Mouly S, Longas-Tejero MA, Bergmann JF. Antiarrhythmics for maintaining sinus rhythm after cardioversion of atrial fibrillation. *Cochrane Database Syst Rev* 2007(4):CD005049.
- W79. Garner SE, Fidan DD, Frankish R, Maxwell L. Rofecoxib for osteoarthritis. *Cochrane Database Syst Rev* 2005(1):CD005115.
- W80. Hodson EM, Jones CA, Strippoli GF, Webster AC, Craig JC. Immunoglobulins, vaccines or interferon for preventing cytomegalovirus disease in solid organ transplant recipients. *Cochrane Database Syst Rev* 2007(2):CD005129.
- W81. Zalmanovici A, Yaphe J. Intranasal steroids for acute sinusitis. *Cochrane Database Syst Rev* 2009(4):CD005149.
- W82. Vital FM, Saconato H, Ladeira MT, Sen A, Hawkes CA, Soares B, et al. Non-invasive positive pressure ventilation (CPAP or bilevel NPPV) for cardiogenic pulmonary edema. *Cochrane Database Syst Rev* 2008(3):CD005351.
- W83. Gurusamy KS, Samraj K. Routine abdominal drainage for uncomplicated open cholecystectomy. *Cochrane Database Syst Rev* 2007(2):CD006003.
- W84. Strippoli GF, Bonifati C, Craig M, Navaneethan SD, Craig JC. Angiotensin converting enzyme inhibitors and angiotensin II receptor antagonists for preventing the progression of diabetic kidney disease. *Cochrane Database Syst Rev* 2006(4):CD006257.
- W85. ACT-I. Collaborative overview of randomised trials of antiplatelet therapy--I: Prevention of death, myocardial infarction, and stroke by prolonged antiplatelet therapy in various categories of patients. Antiplatelet Trialists' Collaboration. *BMJ* 1994;308(6921):81-106.
- W86. ACT-II. Collaborative overview of randomised trials of antiplatelet therapy--II: Maintenance of vascular graft or arterial patency by antiplatelet therapy. Antiplatelet Trialists' Collaboration. *BMJ* 1994;308(6922):159-68.
- W87. ACT-III. Collaborative overview of randomised trials of antiplatelet therapy--III: Reduction in venous thrombosis and pulmonary embolism by antiplatelet prophylaxis among surgical and medical patients. Antiplatelet Trialists' Collaboration. *BMJ* 1994;308(6923):235-46.
- W88. Ballesteros J. Orphan comparisons and indirect meta-analysis: a case study on antidepressant efficacy in dysthymia comparing tricyclic antidepressants, selective serotonin reuptake inhibitors, and monoamine oxidase inhibitors by using general linear models. *J Clin Psychopharmacol* 2005;25(2):127-31.
- W89. Brophy JM, Joseph L. Medical decision making with incomplete evidence--choosing a platelet glycoprotein IIb/IIIa receptor inhibitor for percutaneous coronary interventions. *Med Decis Making* 2005;25(2):222-8.
- W90. Bucher HC, Guyatt GH, Griffith LE, Walter SD. The results of direct and indirect treatment comparisons in meta-analysis of randomized controlled trials. *J Clin Epidemiol* 1997;50(6):683-91.
- W91. Chou R, Fu R, Huffman LH, Korthuis PT. Initial highly-active antiretroviral therapy with a protease inhibitor versus a non-nucleoside reverse transcriptase inhibitor: discrepancies between direct and indirect meta-analyses. *Lancet* 2006;368(9546):1503-15.
- W92. Cooper NJ, Sutton AJ, Lu G, Khunti K. Mixed comparison of stroke prevention treatments in individuals with nonrheumatic atrial fibrillation. *Arch Intern Med* 2006;166(12):1269-75.

- W93. Song F, Harvey I, Lilford R. Adjusted indirect comparison may be less biased than direct comparison for evaluating new pharmaceutical interventions. *J Clin Epidemiol* 2008;61(5):455-63.
- W94. Lam SK, Owen A. Combined resynchronisation and implantable defibrillator therapy in left ventricular dysfunction: Bayesian network meta-analysis of randomised controlled trials. *BMJ* 2007;335(7626):925.
- W95. Marshall JK, Irvine EJ. Rectal corticosteroids versus alternative treatments in ulcerative colitis: a meta-analysis. *Gut* 1997;40(6):775-81.
- W96. Mason L, Moore RA, Edwards JE, Derry S, McQuay HJ. Topical NSAIDs for acute pain: a meta-analysis. *BMC Fam Pract* 2004;5:10.
- W97. Moore A, Collins S, Carroll D, McQuay H, Edwards J. Single dose paracetamol (acetaminophen), with and without codeine, for postoperative pain. *Cochrane Database Syst Rev* 2000(2):CD001547.
- W98. Pagliaro L, D'Amico G, Sorensen TI, Lebrech D, Burroughs AK, Morabito A, et al. Prevention of first bleeding in cirrhosis. A meta-analysis of randomized trials of nonsurgical treatment. *Ann Intern Med* 1992;117(1):59-70.
- W99. Poynard T, Leroy V, Cohard M, Thevenot T, Mathurin P, Opolon P, et al. Meta-analysis of interferon randomized trials in the treatment of viral hepatitis C: effects of dose and duration. *Hepatology* 1996;24(4):778-89.
- W100. Psaty BM, Lumley T, Furberg CD, Schellenbaum G, Pahor M, Alderman MH, et al. Health outcomes associated with various antihypertensive therapies used as first-line agents: a network meta-analysis. *Jama* 2003;289(19):2534-44.
- W101. Small LN, Lau J, Snyderman DR. Preventing post-organ transplantation cytomegalovirus disease with ganciclovir: a meta-analysis comparing prophylactic and preemptive therapies. *Clin Infect Dis* 2006;43(7):869-80.
- W102. Stettler C, Allemann S, Egger M, Windecker S, Meier B, Diem P. Efficacy of drug eluting stents in patients with and without diabetes mellitus: indirect comparison of controlled trials. *Heart* 2006;92(5):650-7.
- W103. Song F, Glenny AM, Altman DG. Indirect comparison in evaluating relative efficacy illustrated by antimicrobial prophylaxis in colorectal surgery. *Control Clin Trials* 2000;21(5):488-97.
- W104. Trindade E, Menon D. Selective serotonin reuptake inhibitors (SSRIs) for major depression. Part I. Evaluation of the clinical literature. Ottawa, ON: Canadian Coordinating Office for Health Technology Assessment, 1997.
- W105. Wu P, Wilson K, Dimoulas P, Mills EJ. Effectiveness of smoking cessation therapies: a systematic review and meta-analysis. *BMC Public Health* 2006;6:300.
- W106. Zhang WY, Li Wan Po A. Efficacy of minor analgesics in primary dysmenorrhoea: a systematic review. *Br J Obstet Gynaecol* 1998;105(7):780-9.
